# Supplementary material
Source: PubMed Central journal article supplement (PMC4353365)
Supplement: pro0024-0395-sd1.pdf [file pro0024-0395-sd1.pdf]

**Supporting Information**

**Structural basis for acceptor-substrate recognition of UDP-glucose:  
anthocyanidin 3-O-glucosyltransferase from *Clitoria ternatea***

Takeshi Hiromoto, Eijiro Honjo, Taro Tamada, Naonobu Noda, Kohei Kazuma,  
Masahiko Suzuki, Michael Blaber and Ryota Kuroki

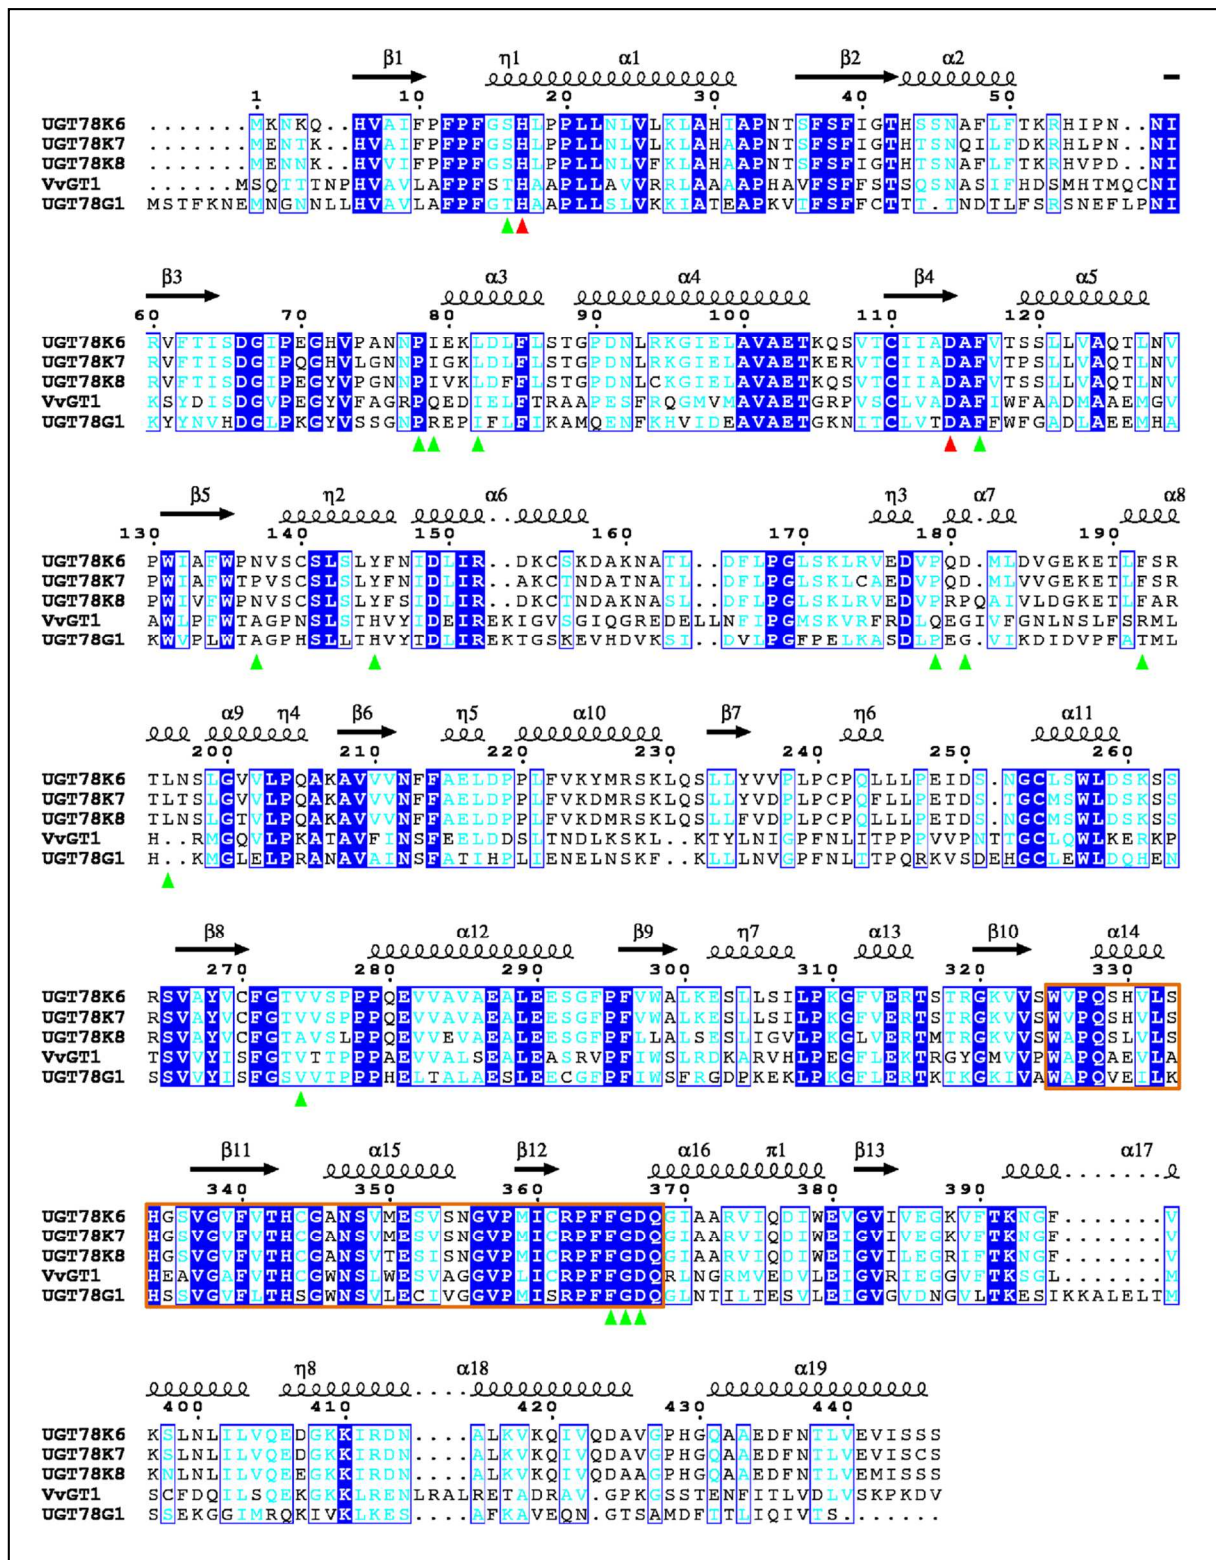

**Figure S1.** Amino acid sequence alignment of UGT78K6 with the homologous flavonoid UGTs. UGT78K7 (UDP-glucose: flavonoid 3-*O*-glucosyltransferase) and UGT78K8 (UDP-glucose: anthocyanin 3',5'-*O*-glucosyltransferase) from *Clitoria ternatea*,<sup>1</sup> showing high sequence identities of 92% and 87% with UGT78K6, respectively, were added to the alignment. The homologous UGTs

detected by the Dali server<sup>2</sup> are as follows: VvGT1 from *Vitis vinifera* (PDB ID: 2C1Z, a flavonoid UGT that functions in anthocyanin biosynthesis<sup>3</sup>) and UGT78G1 from *Medicago truncatula* (PDB ID: 3HBF, an (iso)flavonoid UGT in anthocyanin biosynthesis<sup>4</sup>). The secondary structure elements observed in the UGT78K6 structure are shown above the alignment. Identical residues in all sequences are highlighted in blue. Equivalent residues calculated considering their physic-chemical properties in each column are indicated in cyan letters and enclosed in blue boxes. The proposed His-Asp catalytic dyad and the residues involved in the acceptor binding in the delphinidin-bound form of UGT78K6 are indicated with red and green triangles, respectively. The UGT signature PSPG motif (residues 325-368) is indicated with orange boxes. The sequence alignment was performed by *CLUSTAL-W*<sup>5</sup>, and represented with *ESPrpt*<sup>6</sup>.

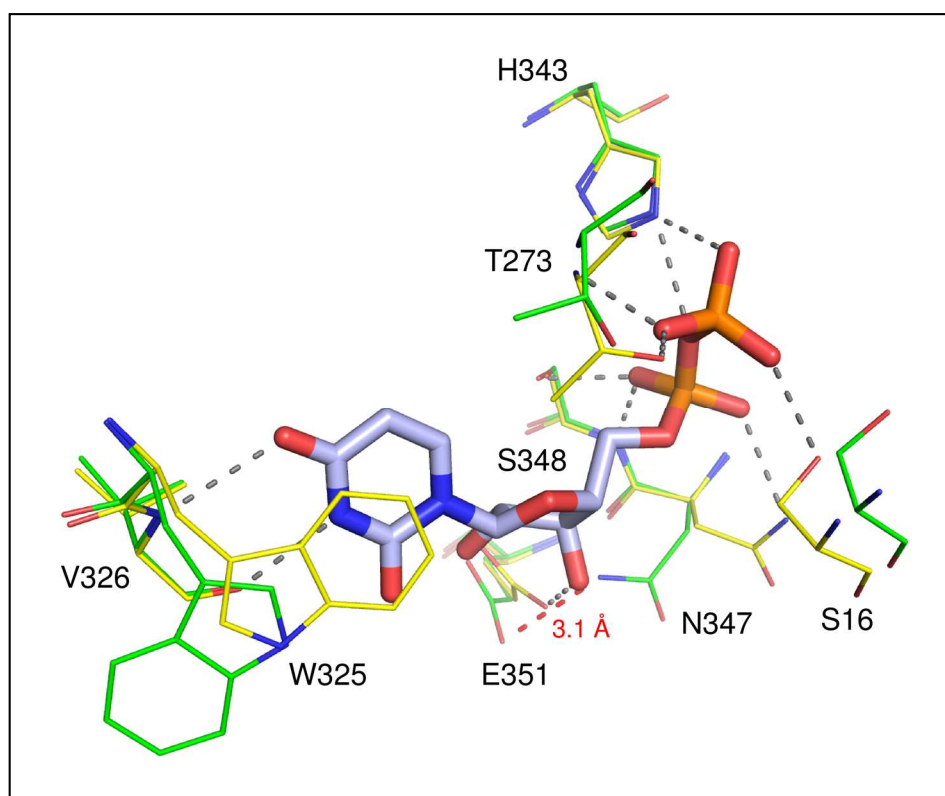

**Figure S2.** Superimposed structures of the unliganded form (green carbon) and the UDP-bound form (yellow carbon) of UGT78K6. The UDP moiety is shown as a stick model. Residues involved in the UDP binding are shown as lines and labeled. Hydrogen bonds are depicted with dotted lines. In particular, the hydrogen bond between the O $\epsilon$ 1 oxygen of Glu351 and the N $\delta$ 2 nitrogen of Asn347 in the unligand form is colored in red.

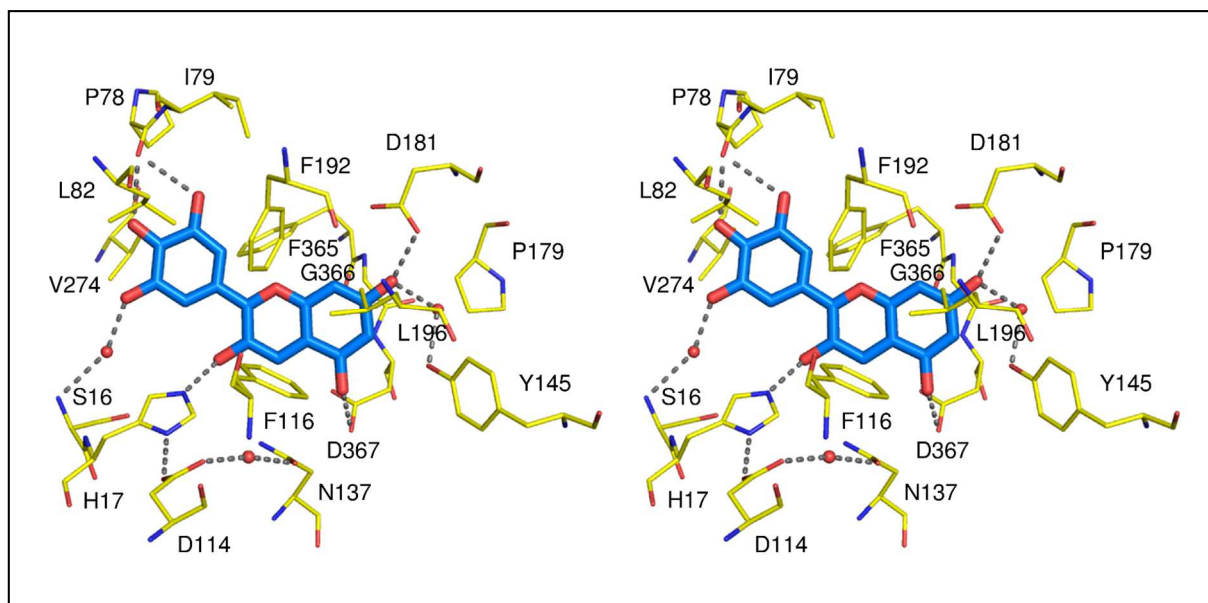

**Figure S3.** Stereo view of the acceptor-binding site in the delphinidin-bound form of UGT78K6. Residues within a distance of 4 Å around the acceptor substrate are shown as yellow lines and labeled. Hydrogen bonds are depicted with dotted lines.

## References

1. Kogawa K, Kato N, Kazuma K, Noda N, Suzuki M (2007) Purification and characterization of UDP-glucose: anthocyanin 3',5'-*O*-glucosyltransferase from *Clitoria ternatea*. *Planta* 226:1501-1509.
2. Holm L, Rosenström P (2010) Dali server: conservation mapping in 3D. *Nucleic Acids Res* 38:W545-W549.
3. Offen W, Martinez-Fleites C, Yang M, Kiat-Lim E, Davis BG, Tarling CA, Ford CM, Bowles DJ, Davies GJ (2006) Structure of a flavonoid glucosyltransferase reveals the basis for plant natural product modification. *EMBO J* 25:1396-1405.
4. Modolo LV, Li L, Pan H, Blount JW, Dixon RA, Wang X (2009) Crystal structures of glucosyltransferase UGT78G1 reveal the molecular basis for glycosylation and deglycosylation of (iso)flavonoids. *J Mol Biol* 392:1292-1302.
5. Thompson JD, Higgins DG, Gibson TJ (1994) *CLUSTAL W*: improving the sensitivity of progressive multiple sequence alignment through sequence weighting, position-specific gap penalties and weight matrix choice. *Nucleic Acids Res* 22:4673-4680.
6. Gouet P, Courcelle E, Stuart DI (1999) *ESPrpt*: analysis of multiple sequence alignments in PostScript. *Bioinformatics* 15:305-308.
